# Supplementary material for: Monolayer SnS2 Schottky barrier field effect transistors: effects of electrodes
Source: Royal Society of Chemistry journal article supplement (doi:10.1039/d4nr02419b), 2024-01-01
Supplement: d4nr02419b1.pdf [file d4nr02419b1.pdf]

## Supplementary Material

### **Monolayer SnS<sub>2</sub> Schottky Barrier Field Effect Transistors: Effect of Electrodes**

Hong Li<sup>1,\*</sup>, Yunfeng Zhang<sup>1</sup>, Fengbin Liu<sup>1</sup>, and Jing Lu<sup>2,3,4\*</sup>

<sup>1</sup> College of Mechanical and Material Engineering, North China University of Technology, Beijing 100144, P. R. China

<sup>2</sup> State Key Laboratory of Mesoscopic Physics and Department of Physics, Peking University, Beijing 100871, P. R. China

<sup>3</sup> Collaborative Innovation Center of Quantum Matter, Beijing 100871, P. R. China

<sup>4</sup> Peking University Yangtze Delta Institute of Optoelectronics, Nantong 226000, P. R. China

\*Corresponding author: [jinglu@pku.edu.cn](mailto:jinglu@pku.edu.cn); [lihong@ncut.edu.cn](mailto:lihong@ncut.edu.cn)

**Table S1.** Energy differences between each stacking pattern and the most stable stacking pattern of the 1T-NbTe<sub>2</sub>/SnS<sub>2</sub> and 2H-NbTe<sub>2</sub>/SnS<sub>2</sub> vdW heterostructures.  $d_v$  is the vertical distance between the two layers.  $\Phi_n^\perp$  is the  $n$ -type vertical Schottky barrier.

|                                            |                     | Atop-I | Atop-II | Fcc-I  | Fcc-II | Hcp-I  | Hcp-II |
|--------------------------------------------|---------------------|--------|---------|--------|--------|--------|--------|
| 1T-<br>NbTe <sub>2</sub> /SnS <sub>2</sub> | $\Delta E$ (eV)     | 0.22   | 0.226   | 0.034  | 0      | 0.052  | 0.05   |
|                                            | $d_v$ (Å)           | 3.5715 | 3.6042  | 2.8547 | 2.6873 | 2.9039 | 2.9452 |
|                                            | $\Phi_n^\perp$ (eV) | 0.051  | -0.047  | 0.093  | 0.105  | -0.084 | -0.019 |
| 2H-<br>NbTe <sub>2</sub> /SnS <sub>2</sub> | $\Delta E$ (eV)     | 0.221  | 0.229   | 0.025  | 0      | 0.054  | 0.033  |
|                                            | $d_v$ (Å)           | 3.5991 | 3.6504  | 2.8622 | 2.7181 | 2.93   | 2.9186 |
|                                            | $\Phi_n^\perp$ (eV) | 0.036  | 0       | 0.4    | 0.385  | -0.012 | 0.223  |

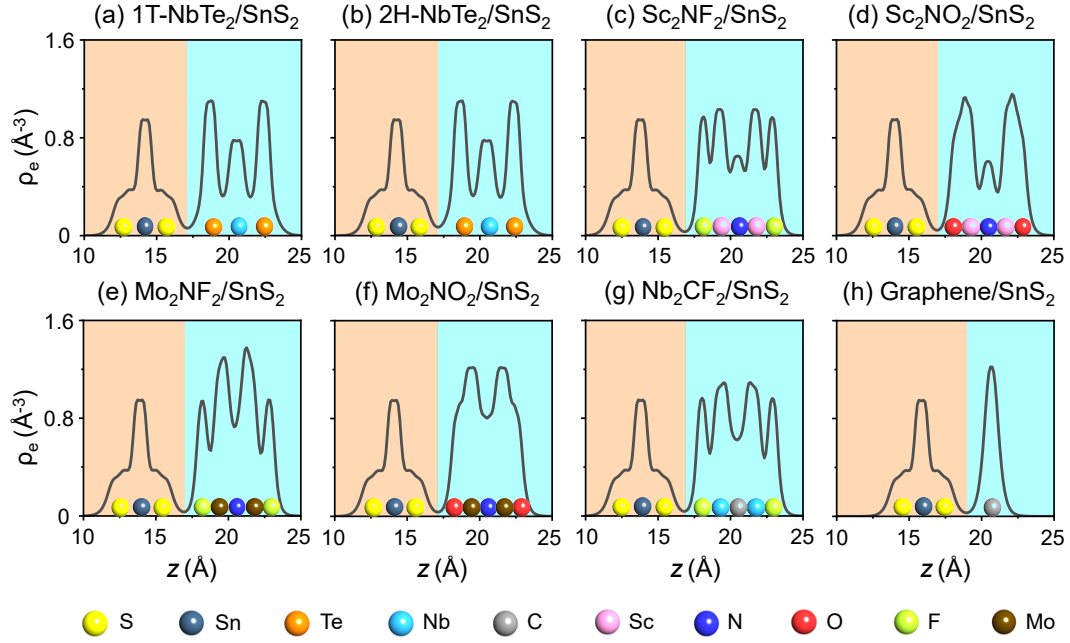

**Figure S1.** The plane-averaged electron densities of the (a) 1T-NbTe<sub>2</sub>/SnS<sub>2</sub>, (b) 2H-NbTe<sub>2</sub>/SnS<sub>2</sub>, (c) Sc<sub>2</sub>NF<sub>2</sub>/SnS<sub>2</sub>, (d) Sc<sub>2</sub>NO<sub>2</sub>/SnS<sub>2</sub>, (e) Mo<sub>2</sub>NF<sub>2</sub>/SnS<sub>2</sub>, (f) Mo<sub>2</sub>NO<sub>2</sub>/SnS<sub>2</sub>, (g) Nb<sub>2</sub>CF<sub>2</sub>/SnS<sub>2</sub>, and (h) graphene/SnS<sub>2</sub> vdW heterostructures.

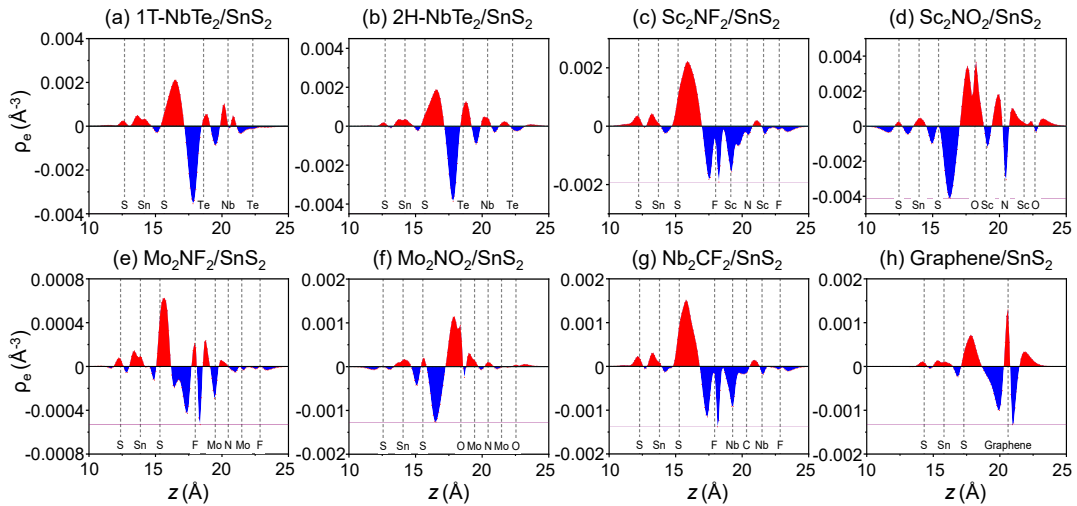

**Figure S2.** The plane-averaged electron density differences of the (a) 1T-NbTe<sub>2</sub>/SnS<sub>2</sub>, (b) 2H-NbTe<sub>2</sub>/SnS<sub>2</sub>, (c) Sc<sub>2</sub>NF<sub>2</sub>/SnS<sub>2</sub>, (d) Sc<sub>2</sub>NO<sub>2</sub>/SnS<sub>2</sub>, (e) Mo<sub>2</sub>NF<sub>2</sub>/SnS<sub>2</sub>, (f) Mo<sub>2</sub>NO<sub>2</sub>/SnS<sub>2</sub>, (g) Nb<sub>2</sub>CF<sub>2</sub>/SnS<sub>2</sub>, and (h) graphene/SnS<sub>2</sub> vdW heterostructures.

**Figure S3.** The vertical Schottky barrier ( $\Phi_n^\perp/\Phi_p^\perp$ ) between ML SnS<sub>2</sub> and various ML metals. The diagonal line denotes the values predicted by the Schottky-Mott model.

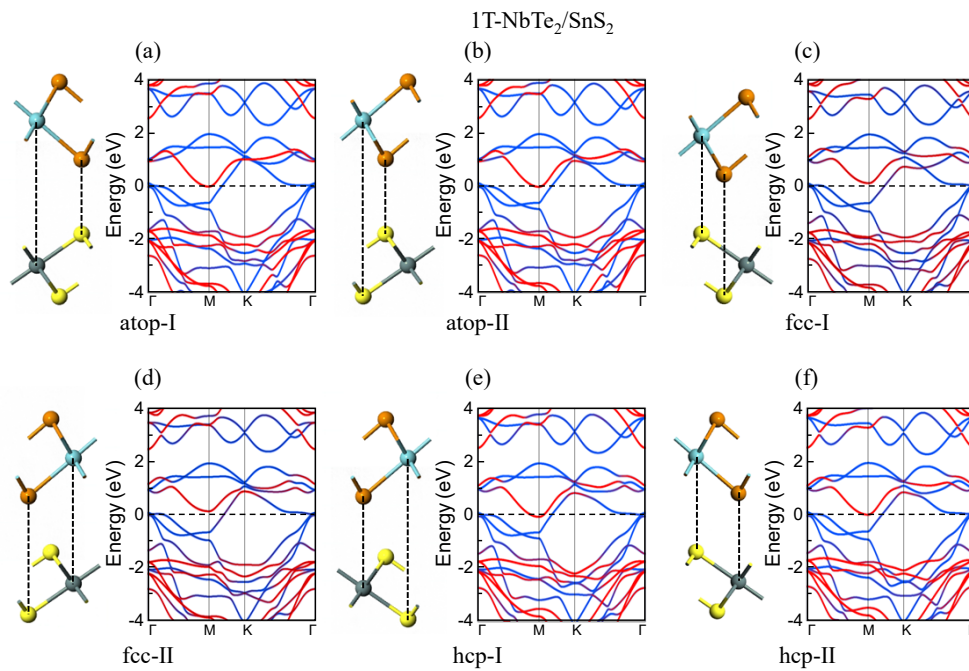

**Figure S4.** The stacking patterns and projected band structures of the 1T-NbTe<sub>2</sub>/SnS<sub>2</sub> vdW heterostructure. (a) Atop-I. (b) Atop-II. (c) Fcc-I. (d) Fcc-II. (e) Hcp-I. (f) Hcp-II.

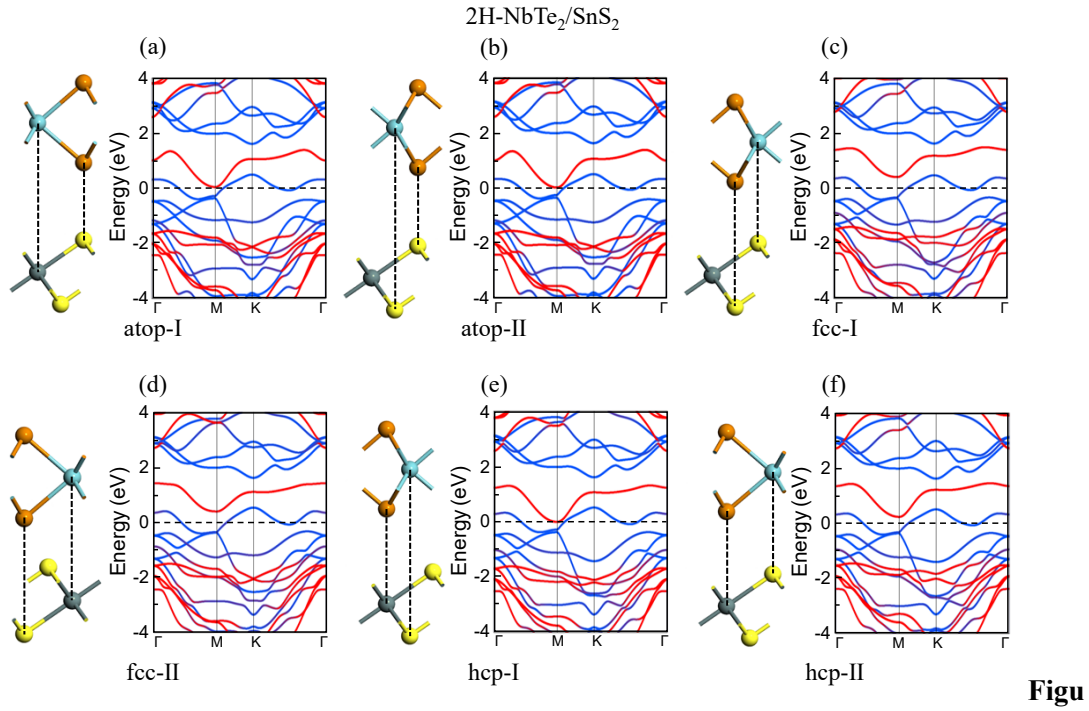

**Figure S5.** The stacking patterns and projected band structures of the  $2\text{H-NbTe}_2/\text{SnS}_2$  vdW heterostructure. (a) Atop-I. (b) Atop-II. (c) Fcc-I. (d) Fcc-II. (e) Hcp-I. (f) Hcp-II.

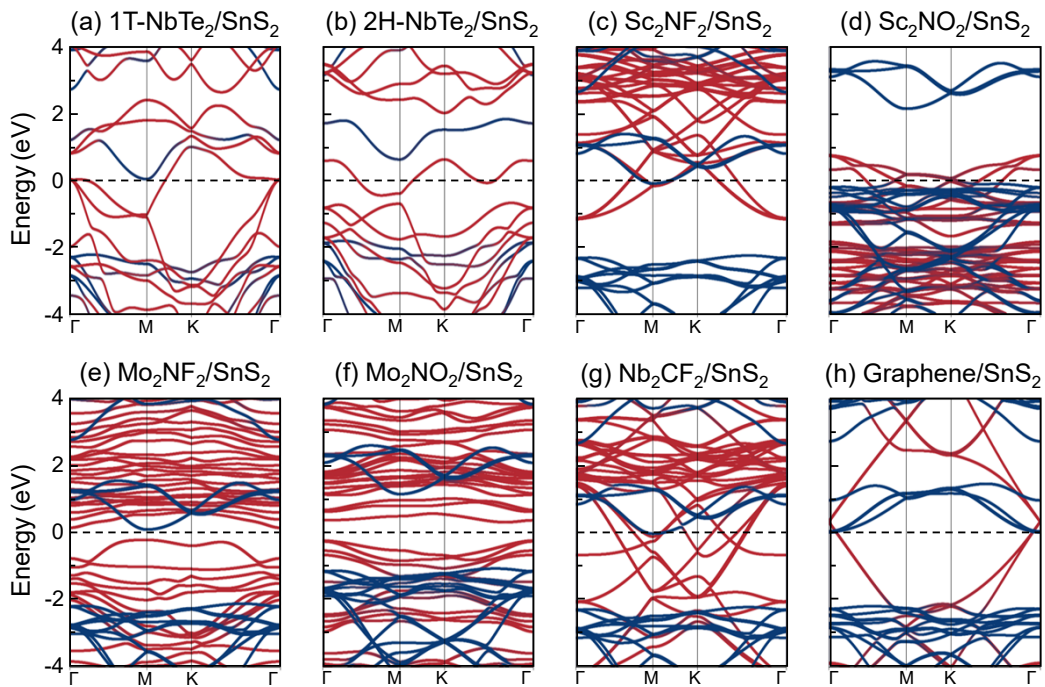

**Figure S6.** Projected band structures with HSE functional of the (a)  $1\text{T-NbTe}_2/\text{SnS}_2$ , (b)  $2\text{H-NbTe}_2/\text{SnS}_2$ , (c)  $\text{Sc}_2\text{NF}_2/\text{SnS}_2$ , (d)  $\text{Sc}_2\text{NO}_2/\text{SnS}_2$ , (e)  $\text{Mo}_2\text{NF}_2/\text{SnS}_2$ , (f)  $\text{Mo}_2\text{NO}_2/\text{SnS}_2$ , (g)  $\text{Nb}_2\text{CF}_2/\text{SnS}_2$ , and (h) graphene/ $\text{SnS}_2$  vdW heterostructures.

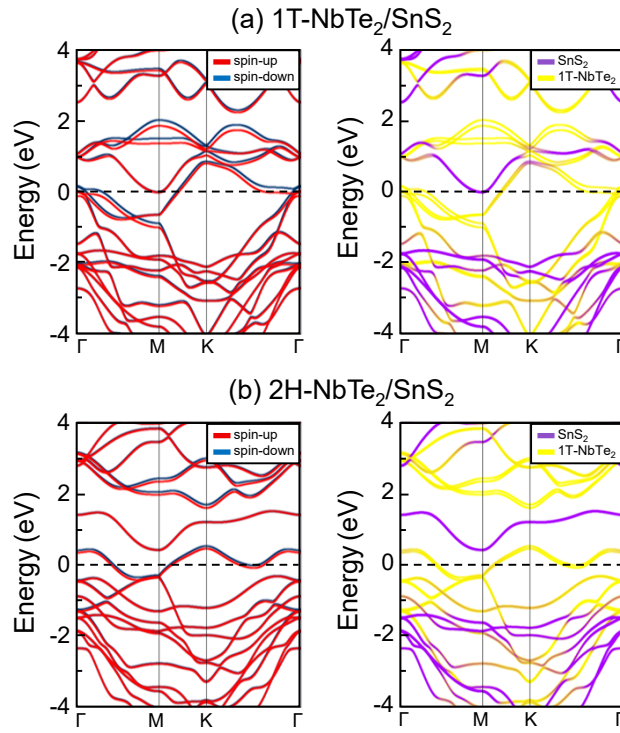

**Figure S7.** Spin-polarized projected band structures of the (a) 1T-NbTe<sub>2</sub>/SnS<sub>2</sub> and (b) 2H-NbTe<sub>2</sub>/SnS<sub>2</sub> vdW heterostructures. Left panel: projected on spins. Right panel: projected on layers.
